# Supplementary material for: DHAV-1 2A1 Peptide – A Newly Discovered Co-expression Tool That Mediates the Ribosomal “Skipping” Function
Source: Front Microbiol. 2018 Nov 15;9:2727. doi: 10.3389/fmicb.2018.02727 (PMC6249498; doi:10.3389/fmicb.2018.02727)
Supplement: Supplementary file 1 [file Data_Sheet_1.docx]

Supplementary Material

DHAV-1 2A1 peptide - A Newly Discovered Co-expression Tool that Mediates the Ribosomal ‘Skipping’ Function

Xiaoyao Yang1,2,3+, Qiurui Zeng4+, Mingshu Wang1,2,3+, Anchun Cheng1,2,3*, Kangcheng Pan2, Dekang Zhu2,3, Mafeng Liu1,2,3, Renyong Jia1,2,3, Qiao Yang1,2,3, Ying Wu1,2,3, Shun Chen1,2,3, Xinxin Zhao1,2,3, Shaqiu Zhang1,2,3, Yunya Liu1,2,3, Yanling Yu1,2,3, Ling Zhang1,2,3

*** Correspondence:** Anchun Cheng: chenganchun@vip.163.com

# Supplementary Figures and Tables


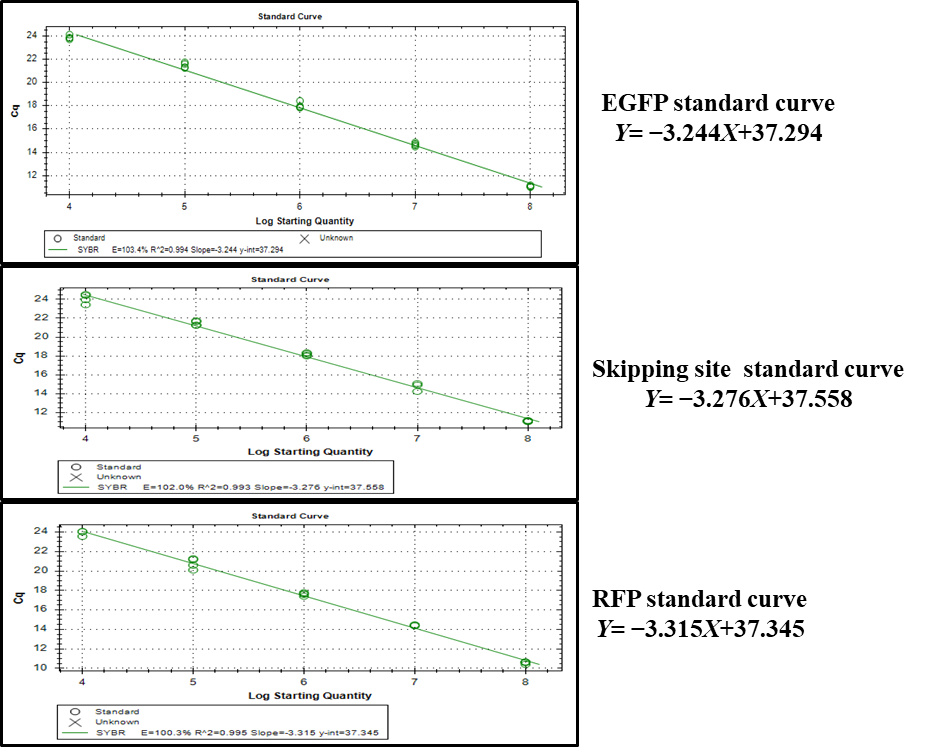


**Supplementary Figure 1.** The standard cure of EGFP, skipping site and RFP fragment respectively for qRT-PCR. Their detection range are all from 104~108 copies/μl
